# Supplementary material for: Hypercaloric diets with increased meal frequency, but not meal size, increase intrahepatic triglycerides: A randomized controlled trial
Source: PubMed Central journal article supplement — Hepatology. 2014 May 13;60(2):545–53. doi: 10.1002/hep.27149 (PMC4265261; doi:10.1002/hep.27149), 2014-05-13
Supplement: hep0060-0545-SD1.pdf [file hep0060-0545-SD1.pdf]

### *Two-step hyperinsulinemic euglycemic clamp*

Subjects were admitted to the Metabolic Clinical Research Unit of the AMC after an overnight fast and studied in the supine position. A catheter was inserted into the distal vein of each arm. One catheter was used for sampling of arterialized blood using a heated hand box (55 C). The other catheter was used for infusion of [6,6-<sup>2</sup>H<sub>2</sub>]glucose, glucose 20%, and insulin. At 09:00 h (t = -2.0 h), after drawing a blood sample for background enrichment of plasma glucose, a continuous infusion of [6,6-<sup>2</sup>H<sub>2</sub>]glucose (99% enriched; Cambridge Isotopes, Andover MA, USA) was started at a rate of 0.11 μmol/kg·min after a priming dose equivalent to 80 minutes. After an equilibration time of 2 hours, blood samples were drawn for glucose enrichments, FFA and glucoregulatory hormones. Thereafter a continuous infusion of insulin (Actrapid 100U/ml; Novo Nordisk Farma, Alphen a/d Rijn, The Netherlands) was started for 2.0 h at a rate of 20 mU/m<sup>2</sup> body surface area·min. Plasma glucose was measured every 10 minutes and glucose 20% enriched with 1% [6,6-<sup>2</sup>H<sub>2</sub>]glucose was infused at a variable rate to maintain plasma glucose at 5.0 mmol/L. At t = 2 h, blood samples were drawn for glucose enrichment, glucoregulatory hormones and FFA. Thereafter the infusion of insulin was increased to a rate of 60 mU/m<sup>2</sup> body surface area·min and the blood drawings were repeated at t= 4 h.

### *Laboratory analyses*

Plasma glucose concentrations were measured with the glucose oxidase method using a Biosen C-line plus glucose analyzer (EKF Diagnostics, Barleben/Magedeburg, Germany). Insulin and cortisol were determined on an IMMULITE 2000 system (Siemens Healthcare Diagnostics B.V., Breda, The Netherlands). Cortisol was determined with a chemiluminescent immunoassay (intra-assay variation 7–8%; total-assay variation 7–8%; detection limit 50 nM). Insulin was determined with a chemiluminescent immunometric assay (intra-assay variation 3–6%; total-assay variation 4%; detection limit 15 pM). FFA were measured by an enzymatic method (Nefac; Wako Chemicals, Richmond, VA, USA) (intra-assay variation 1%; total-assay variation 4–15%; detection limit 0.02 mM). Leptin was determined with a human leptin radioimmunoassay kit (Millipore) (intra-assay variation 3–8%; total-assay variation 3–6%; detection limit 0.5 ng/ml). Glucagon was determined with the Linco 125I radioimmunoassay (Merck Millipore) (intra-assay variation 9–10%; total-assay variation 5–7%; detection limit 15 ng/l). [6,6-<sup>2</sup>H<sub>2</sub>] glucose enrichment was measured with gas chromatography-mass spectrometry as described in detail earlier (1).

## Reference List

1. Ackermans MT, Pereira Arias AM, Bisschop PH, Endert E, Sauerwein HP, Romijn JA. The quantification of gluconeogenesis in healthy men by (2)H<sub>2</sub>O and [2-(13)C]glycerol yields different results: rates of gluconeogenesis in healthy men measured with (2)H<sub>2</sub>O are higher than those measured with [2-(13)C]glycerol. *J Clin Endocrinol Metab* 2001 May;86(5):2220-2226.
